# Supplementary material
Source: ML conference proceedings conference paper supplement (https://openaccess.thecvf.com/content/WACV2023/html/Steininger_The_CropAndWeed_Dataset_WACV_2023_paper.html)
Supplement: Supplementary file 1 [file Steininger_The_CropAndWeed_Dataset_WACV_2023_supplemental.pdf]

# The CropAndWeed Dataset: a Multi-Modal Learning Approach for Efficient Crop and Weed Manipulation

## Supplementary Material

Daniel Steininger

Andreas Trondl

Gerardus Croonen

Julia Simon

Verena Widhalm

AIT Austrian Institute of Technology

{daniel.steininger, andreas.trondl.fl, gerardus.croonen, verena.widhalm, julia.simon}@ait.ac.at

### A. Detection performance by instance size

As an extension to Table 3 of the main paper the complete list of detection performances for individual weed classes is shown in Table 1. The omitted value for *Labiata* results from insufficient representation of according large instances in the test data. Analogously, performance for crop classes by size of all models is presented in Tables 2, 3, 4 and 5.

|             | S           | M           | L           | Overall     |
|-------------|-------------|-------------|-------------|-------------|
| Grasses     | 19.1        | 40.9        | 67.0        | <b>34.5</b> |
| Amaranth    | 19.4        | 38.5        | 66.2        | <b>40.8</b> |
| Goosefoot   | 33.6        | 56.9        | 78.3        | <b>51.8</b> |
| Knotweed    | 20.6        | 56.3        | 66.9        | <b>47.7</b> |
| Corn spurry | 24.7        | 49.4        | 75.0        | <b>41.8</b> |
| Chickweed   | 8.4         | 20.5        | 53.9        | <b>23.0</b> |
| Solanales   | 21.9        | 41.0        | 76.9        | <b>50.9</b> |
| Potato weed | 39.7        | 45.9        | 63.5        | <b>43.3</b> |
| Chamomile   | 27.9        | 61.2        | 76.4        | <b>58.9</b> |
| Thistle     | 40.7        | 64.5        | 88.6        | <b>62.6</b> |
| Mercuries   | 36.8        | 47.0        | 31.2        | <b>38.6</b> |
| Geranium    | 30.5        | 39.3        | 41.6        | <b>33.7</b> |
| Crucifer    | 25.9        | 61.6        | 66.5        | <b>45.7</b> |
| Poppy       | 35.0        | 66.6        | 86.4        | <b>65.4</b> |
| Plantago    | 21.1        | 56.7        | 57.2        | <b>45.1</b> |
| Labiata     | 43.0        | 48.2        | -           | <b>45.4</b> |
|             | <b>28.0</b> | <b>49.7</b> | <b>66.4</b> | <b>45.6</b> |

Table 1. Performance (mAP) of the *Fine24* detection model by instance size and overall for all weed classes.

### B. Complete label specification

A complete overview of all species currently included in the CropAndWeed dataset, along with their occurrence in recording sessions, images and instances is given in Tables 6 and 7. Furthermore, each plant type is assigned a group

ID for mapping it to the dataset variants presented in Section 4.1 of the main paper, as presented in Table 8.

### C. Extended qualitative results

Figures 1 and 2 show additional qualitative results on the test set for combined detection, segmentation and stem localization, analogous to Figure 6 of the main paper.

|                | <b>Maize</b> | <b>Sugar beet</b> | <b>Bean</b> | <b>Pea</b>  | <b>Sunflower</b> | <b>Soy</b>  | <b>Potato</b> | <b>Pumpkin</b> |
|----------------|--------------|-------------------|-------------|-------------|------------------|-------------|---------------|----------------|
| <b>S</b>       | 35.1         | 40.9              | 45.4        | 36.3        | 33.7             | 41.6        | 73.4          | 40.4           |
| <b>M</b>       | 73.0         | 75.8              | 83.4        | 69.3        | 78.4             | 56.2        | 67.4          | 80.4           |
| <b>L</b>       | 84.5         | 90.2              | 96.8        | 73.8        | 95.6             | 73.4        | 73.3          | 93.9           |
| <b>Overall</b> | <b>76.5</b>  | <b>79.0</b>       | <b>82.7</b> | <b>66.9</b> | <b>80.6</b>      | <b>53.9</b> | <b>70.8</b>   | <b>89.2</b>    |

Table 2. Performance (mAP) of the *Fine24* detection model by instance size for all crop classes along with overall values presented in the main paper.

|                | <b>Maize</b> | <b>Sugar beet</b> | <b>Bean</b> | <b>Pea</b>  | <b>Sunflower</b> | <b>Soy</b>  | <b>Potato</b> | <b>Pumpkin</b> |
|----------------|--------------|-------------------|-------------|-------------|------------------|-------------|---------------|----------------|
| <b>S</b>       | 40.0         | 37.2              | 38.8        | 28.0        | 24.9             | 43.3        | 39.9          | 5.3            |
| <b>M</b>       | 71.4         | 73.3              | 71.3        | 70.5        | 79.6             | 57.1        | 67.6          | 81.7           |
| <b>L</b>       | 84.7         | 94.0              | 91.1        | 71.0        | 98.0             | 73.8        | 88.0          | 95.3           |
| <b>Overall</b> | <b>76.1</b>  | <b>81.1</b>       | <b>73.6</b> | <b>67.5</b> | <b>81.4</b>      | <b>53.9</b> | <b>70.8</b>   | <b>88.7</b>    |

Table 3. Performance (mAP) of the *CropsOrWeed9* detection model by instance size for all crop classes along with overall values presented in the main paper.

|                | <b>Maize</b> | <b>Sugar beet</b> | <b>Bean</b> | <b>Pea</b>  | <b>Sunflower</b> | <b>Soy</b>  | <b>Potato</b> | <b>Pumpkin</b> |
|----------------|--------------|-------------------|-------------|-------------|------------------|-------------|---------------|----------------|
| <b>S</b>       | 35.1         | 40.9              | 45.4        | 36.3        | 33.7             | 41.6        | 73.4          | 40.4           |
| <b>M</b>       | 73.0         | 75.8              | 83.4        | 69.3        | 78.4             | 56.2        | 67.4          | 80.4           |
| <b>L</b>       | 84.5         | 90.2              | 96.8        | 73.8        | 95.6             | 73.4        | 73.3          | 93.9           |
| <b>Overall</b> | <b>76.5</b>  | <b>79.0</b>       | <b>82.7</b> | <b>66.9</b> | <b>80.6</b>      | <b>53.9</b> | <b>70.8</b>   | <b>89.2</b>    |

Table 4. Performance (mAP) of the *Crop2* detection models by instance size for all crop classes along with overall values presented in the main paper.

|                | <b>Maize</b> | <b>Sugar beet</b> | <b>Bean</b> | <b>Pea</b>  | <b>Sunflower</b> | <b>Soy</b>  | <b>Potato</b> | <b>Pumpkin</b> |
|----------------|--------------|-------------------|-------------|-------------|------------------|-------------|---------------|----------------|
| <b>S</b>       | 33.9         | 30.4              | 37.7        | 0.0         | 8.3              | 27.6        | 0.0           | 0.0            |
| <b>M</b>       | 71.7         | 72.1              | 68.1        | 35.6        | 66.4             | 55.2        | 10.5          | 42.1           |
| <b>L</b>       | 83.1         | 88.7              | 81.0        | 16.1        | 75.3             | 72.1        | 29.5          | 85.0           |
| <b>Overall</b> | <b>75.0</b>  | <b>74.4</b>       | <b>68.3</b> | <b>29.4</b> | <b>62.9</b>      | <b>52.8</b> | <b>21.2</b>   | <b>74.3</b>    |

Table 5. Performance (mAP) of the *Crop1* detection models by instance size for all crop classes along with overall values presented in the main paper.

| Species              | Botanical Classification                     | Crop/Weed | Sessions | Images | Instances | Mapping |
|----------------------|----------------------------------------------|-----------|----------|--------|-----------|---------|
| Soil                 | Soil                                         | -         | -        | -      | -         | -       |
| Maize                | <i>Zea mays</i>                              | C         | 167      | 1834   | 6018      | 1       |
| Sugar beet           | <i>Beta vulgaris</i> subsp. <i>vulgaris</i>  | C         | 133      | 1210   | 6161      | 2       |
| Pea                  | <i>Pisum sativum</i>                         | C         | 18       | 176    | 621       | 6       |
| Courgette            | <i>Cucurbita pepo</i> subsp. <i>p. c. g.</i> | C         | 1        | 18     | 22        | -       |
| Pumpkins             | <i>Cucurbita</i>                             | C         | 11       | 317    | 615       | 8       |
| Potato               | <i>Solanum tuberosum</i>                     | C         | 15       | 108    | 371       | 5       |
| Flat leaf parsley    | <i>Petroselinum stivum</i>                   | C         | 1        | 14     | 35        | -       |
| Curly leaf parsley   | <i>Petroselinum crispum</i>                  | C         | 1        | 10     | 35        | -       |
| Cowslip              | <i>Primula veris</i>                         | C         | 1        | 19     | 108       | -       |
| Poppy                | <i>Papaver</i>                               | C         | 1        | 2      | 25        | 22      |
| Sunflower            | <i>Helianthus annuus</i>                     | C         | 62       | 590    | 1879      | 4       |
| Sage                 | <i>Salvia</i>                                | C         | 1        | 2      | 23        | -       |
| Common bean          | <i>Phaseolus vulgaris</i>                    | C         | 2        | 13     | 109       | 7       |
| Faba bean            | <i>Vicia faba</i>                            | C         | 20       | 216    | 952       | 7       |
| Hybrid goosefoot     | <i>Chenopodium hybridum</i>                  | W         | 72       | 205    | 329       | 11      |
| Black-bindweed       | <i>Fallopia convolvulus</i>                  | W         | 15       | 45     | 195       | 12      |
| Cocksbur grass       | <i>Echinochloa crus-galli</i>                | W         | 118      | 270    | 1280      | 10      |
| Red-root amaranth    | <i>Amaranthus retroflexus</i>                | W         | 203      | 491    | 3484      | 10      |
| White goosefoot      | <i>Chenopodium album</i>                     | W         | 322      | 1121   | 3180      | 11      |
| Thorn apple          | <i>Datura stramonium</i>                     | W         | 46       | 167    | 469       | 15      |
| Potato weed          | <i>Galinsoga parviflora</i>                  | W         | 219      | 636    | 2563      | 16      |
| German chamomile     | <i>Matricaria chamomilla</i>                 | W         | 102      | 300    | 2113      | 17      |
| Creeping thistle     | <i>Cirsium arvense</i>                       | W         | 86       | 410    | 2693      | 18      |
| Field milk thistle   | <i>Sonchus arvensis</i>                      | W         | 202      | 513    | 2623      | 18      |
| Purslane             | <i>Portulaca oleracea</i>                    | W         | 22       | 30     | 70        | -       |
| Black nightshade     | <i>Solanum nigrum</i>                        | W         | 9        | 9      | 14        | 15      |
| Mercuries            | <i>Mercurialis</i>                           | W         | 253      | 812    | 1147      | 19      |
| Geraniums            | <i>Geranium</i>                              | W         | 41       | 90     | 667       | 20      |
| Cleavers             | <i>Galium aparine</i>                        | W         | 8        | 20     | 35        | -       |
| Meadow-grass         | <i>Poa</i>                                   | W         | 232      | 763    | 3785      | 10      |
| Frosted orach        | <i>Atriplex laciniata</i>                    | W         | 1        | 1      | 1         | 11      |
| Black horehound      | <i>Ballota nigra</i>                         | W         | 1        | 1      | 1         | 24      |
| Shepherd's purse     | <i>Capsella bursa-pastoris</i>               | W         | 4        | 5      | 8         | 21      |
| Field bindweed       | <i>Convolvulus arvensis</i>                  | W         | 57       | 161    | 533       | 15      |
| Common mugwort       | <i>Artemisia vulgaris</i>                    | W         | 2        | 2      | 2         | -       |
| Hedge mustard        | <i>Sisymbrium</i>                            | W         | 19       | 22     | 29        | 21      |
| Speedwell            | <i>Veronica</i>                              | W         | 37       | 53     | 108       | 23      |
| Broadleaf plantain   | <i>Plantago major</i>                        | W         | 9        | 12     | 12        | 23      |
| White ball-mustard   | <i>Calepina irregularis</i>                  | W         | 1        | 1      | 2         | 21      |
| Peppermint           | <i>Mentha piperita</i>                       | W         | 18       | 84     | 602       | 24      |
| Field pennycress     | <i>Thlaspi arvense</i>                       | W         | 22       | 79     | 118       | 21      |
| Corn spurry          | <i>Spergula arvensis</i>                     | W         | 19       | 125    | 922       | 13      |
| Purple crabgrass     | <i>Digitaria sanguinalis</i>                 | W         | 9        | 81     | 473       | 10      |
| Common fumitory      | <i>Fumaria officinalis</i>                   | W         | 11       | 73     | 227       | 22      |
| Ivy-leaved speedwell | <i>Veronica hederifolia</i>                  | W         | 10       | 60     | 237       | 23      |
| Annual meadow grass  | <i>Poa annua</i>                             | W         | 6        | 24     | 447       | 10      |
| Redshank             | <i>Persicaria maculosa</i>                   | W         | 30       | 129    | 428       | 12      |
| Rough meadow-grass   | <i>Poa trivialis</i>                         | W         | 4        | 17     | 405       | 10      |

Table 6. Full list of annotated species included in the CropAndWeed dataset and corresponding numbers of sessions, images and instances depicting them as well as mapping ids for deriving dataset variants presented in Table 8 (part 1).

| Species            | Botanical Classification                  | Crop/Weed | Sessions   | Images      | Instances     | Mapping |
|--------------------|-------------------------------------------|-----------|------------|-------------|---------------|---------|
| Green bristlegrass | <i>Setaria viridis</i>                    | W         | 287        | 1648        | 12132         | 10      |
| Small geranium     | <i>Geranium pusillum</i>                  | W         | 42         | 406         | 4428          | 20      |
| Cornflower         | <i>Cyanus segetum</i>                     | W         | 27         | 270         | 1780          | 18      |
| Common corn-cockle | <i>Agrostemma githago</i>                 | W         | 20         | 211         | 1601          | 18      |
| Wall barley        | <i>Hordeum murinum</i>                    | W         | 16         | 88          | 466           | 10      |
| Annual fescue      | <i>Festuca myuros</i>                     | W         | 4          | 9           | 85            | 10      |
| Purple dead-nettle | <i>Lamium purpureum</i>                   | W         | 27         | 39          | 47            | 24      |
| Ribwort plantain   | <i>Plantago lanceolata</i>                | W         | 14         | 100         | 943           | 23      |
| Pineappleweed      | <i>Matricaria discoidea</i>               | W         | 25         | 69          | 608           | 17      |
| Common chickweed   | <i>Stellaria media</i>                    | W         | 36         | 86          | 219           | 14      |
| Hedge mustard      | <i>Sisymbrium officinale</i>              | W         | 25         | 121         | 917           | 21      |
| Soft brome         | <i>Bromus hordeaceus</i>                  | W         | 8          | 47          | 368           | 10      |
| Wild pansy         | <i>Viola tricolor</i>                     | W         | 46         | 96          | 263           | -       |
| Yellow rocket      | <i>Barbarea vulgaris</i>                  | W         | 19         | 81          | 379           | 21      |
| Common wild oat    | <i>Avena fatua</i>                        | W         | 22         | 105         | 390           | 10      |
| Red poppy          | <i>Papaver rhoeas</i>                     | W         | 15         | 39          | 630           | 22      |
| Rye brome          | <i>Bromus secalinus</i>                   | W         | 8          | 66          | 594           | 10      |
| Knotgrass          | <i>Polygonum aviculare</i> agg.           | W         | 43         | 67          | 408           | 12      |
| Prickly lettuce    | <i>Lactuca serriola</i>                   | W         | 3          | 5           | 5             | 18      |
| Copse-bindweed     | <i>Fallopia dumetorum</i>                 | W         | 194        | 858         | 1790          | 12      |
| Common buckwheat   | <i>Fagopyrum esculentum</i>               | W         | 19         | 83          | 211           | 12      |
| Garlic             | <i>Allium sativum</i>                     | C         | 1          | 1           | 2             | -       |
| Soybean            | <i>Glycine max</i>                        | C         | 42         | 336         | 4039          | 3       |
| Wild carrot        | <i>Daucus carota</i> supsp. <i>carota</i> | W         | 18         | 42          | 69            | -       |
| Field mustard      | <i>Sinapis arvensis</i>                   | W         | 28         | 49          | 402           | 21      |
| Common dandelion   | <i>Taraxacum</i> sect. <i>Ruderalia</i>   | W         | 1          | 1           | 1             | -       |
| Vegetation         | Vegetation                                | W         | 788        | 5066        | 33000         | 26      |
| <b>Overall</b>     |                                           |           | <b>929</b> | <b>8034</b> | <b>111953</b> |         |

Table 7. Full list of annotated species included in the CropAndWeed dataset and corresponding numbers of sessions, images and instances depicting them as well as mapping ids for deriving dataset variants presented in Table 8 (part 2).

| Mapping | Fine24      | CropsOrWeed9 | CropOrWeed2 | Coarse1    | Maize2 | Maize1 |
|---------|-------------|--------------|-------------|------------|--------|--------|
| 1       | Maize       | Maize        | Crop        |            | Maize  | Maize  |
| 2       | Sugar beet  | Sugar beet   |             |            |        |        |
| 3       | Sunflower   | Sunflower    |             |            |        |        |
| 4       | Bean        | Bean         |             |            |        |        |
| 5       | Pea         | Pea          |             |            |        |        |
| 6       | Soy         | Soy          |             |            |        |        |
| 7       | Potato      | Potato       |             |            |        |        |
| 8       | Pumpkin     | Pumpkin      |             |            |        |        |
| 9       | Grasses     | Weed         | Weed        | Vegetation | Other  | -      |
| 10      | Thistle     |              |             |            |        |        |
| 11      | Geranium    |              |             |            |        |        |
| 12      | Knotweed    |              |             |            |        |        |
| 13      | Amaranth    |              |             |            |        |        |
| 14      | Goosefoot   |              |             |            |        |        |
| 15      | Potato weed |              |             |            |        |        |
| 16      | Chamomile   |              |             |            |        |        |
| 17      | Crucifer    |              |             |            |        |        |
| 18      | Plantago    |              |             |            |        |        |
| 19      | Poppy       |              |             |            |        |        |
| 20      | Corn spurry |              |             |            |        |        |
| 21      | Mercuries   |              |             |            |        |        |
| 22      | Solanales   |              |             |            |        |        |
| 23      | Chickweed   |              |             |            |        |        |
| 24      | Labiata     |              |             |            |        |        |

Table 8. Mapping of species listed in Tables 6 and 7 to the classes of the defined dataset variants. The mappings for all other crop-specific variants summarized as *Crop[2/1]* (*Sugar beet, Sunflower, Bean, Pea, Soy, Potato* and *Pumpkin*) are analogous to *Maize2* and *Maize1*.

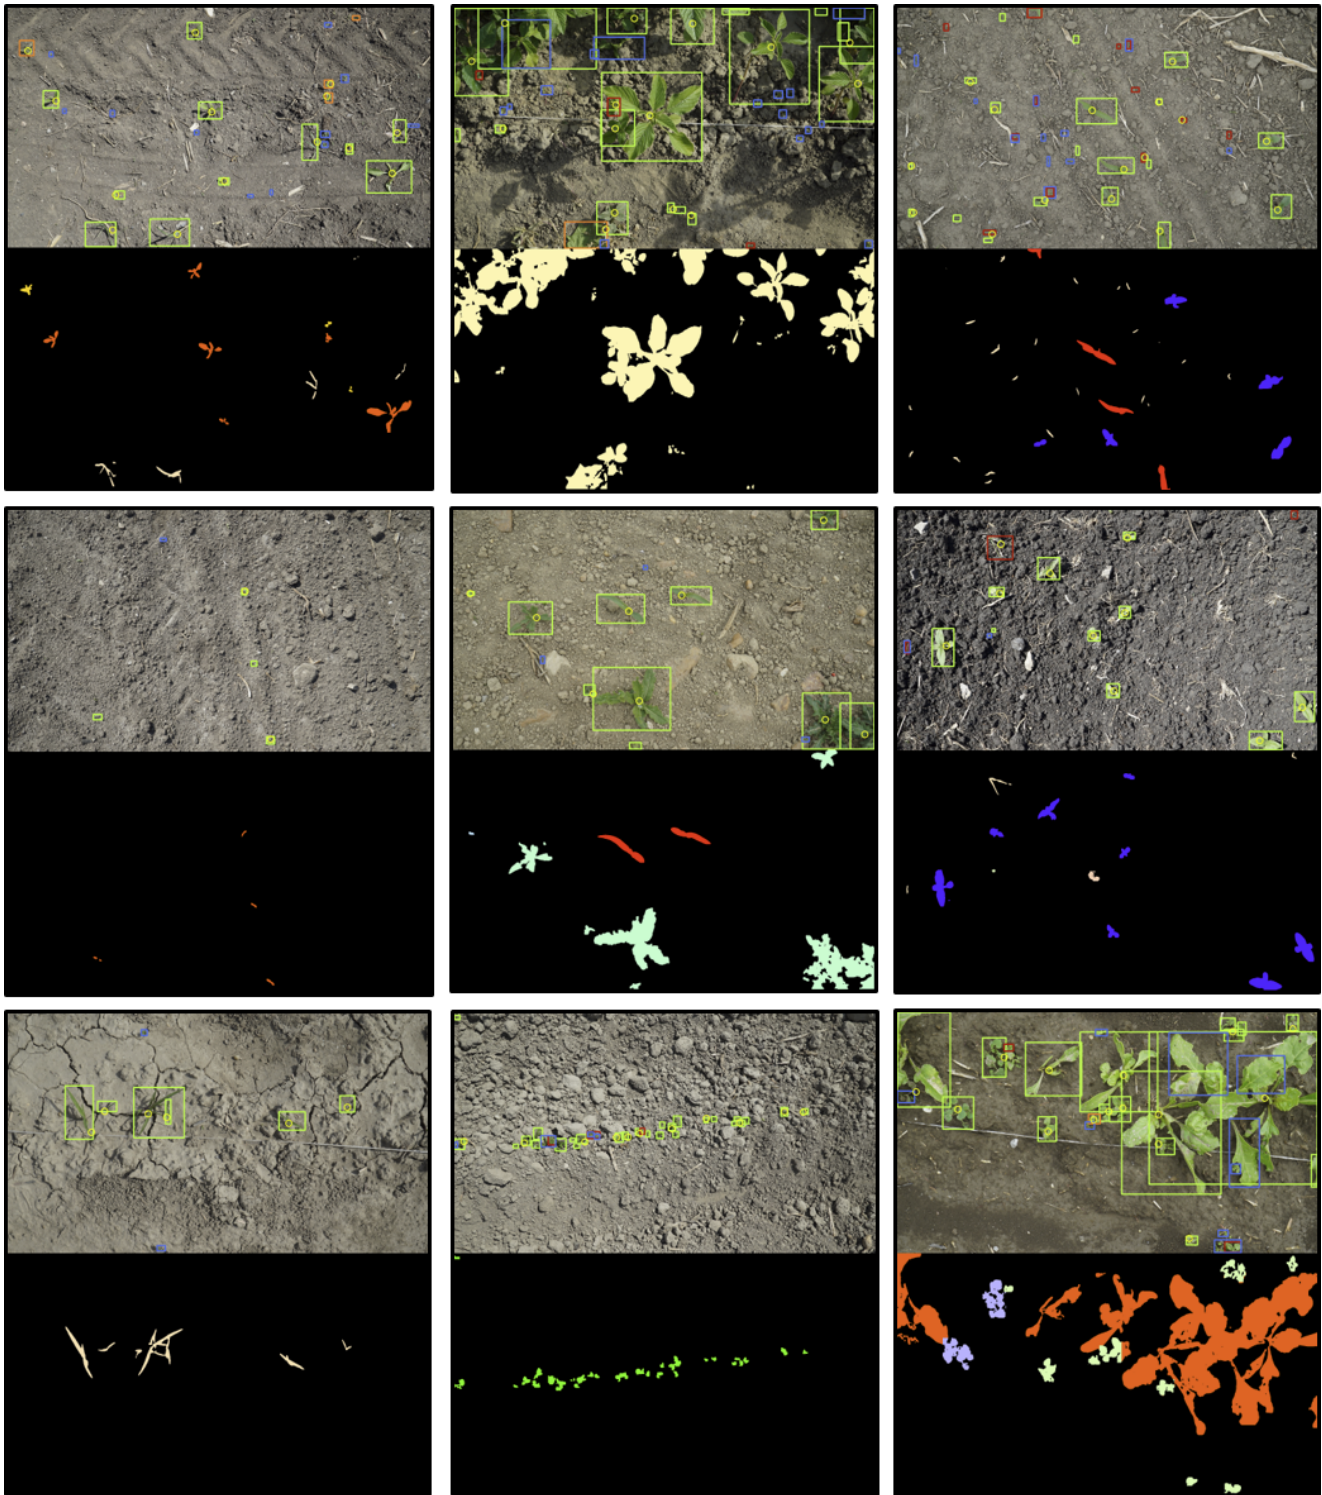

Figure 1. Representative selection of combined qualitative results on the test set for detection, segmentation and stem localization. Top rows show detection results of the *Fine24* model (green: correct detection (*TP*), orange: correct localization, but incorrect class, red: incorrect detection (*FP*), blue: undetected ground-truth object (*FN*)). The detections are then used as inputs for stem localization (yellow) and the *Coarse1* segmentation model. Results of the latter are demonstrated in the bottom rows, with colors corresponding to the detected classes.



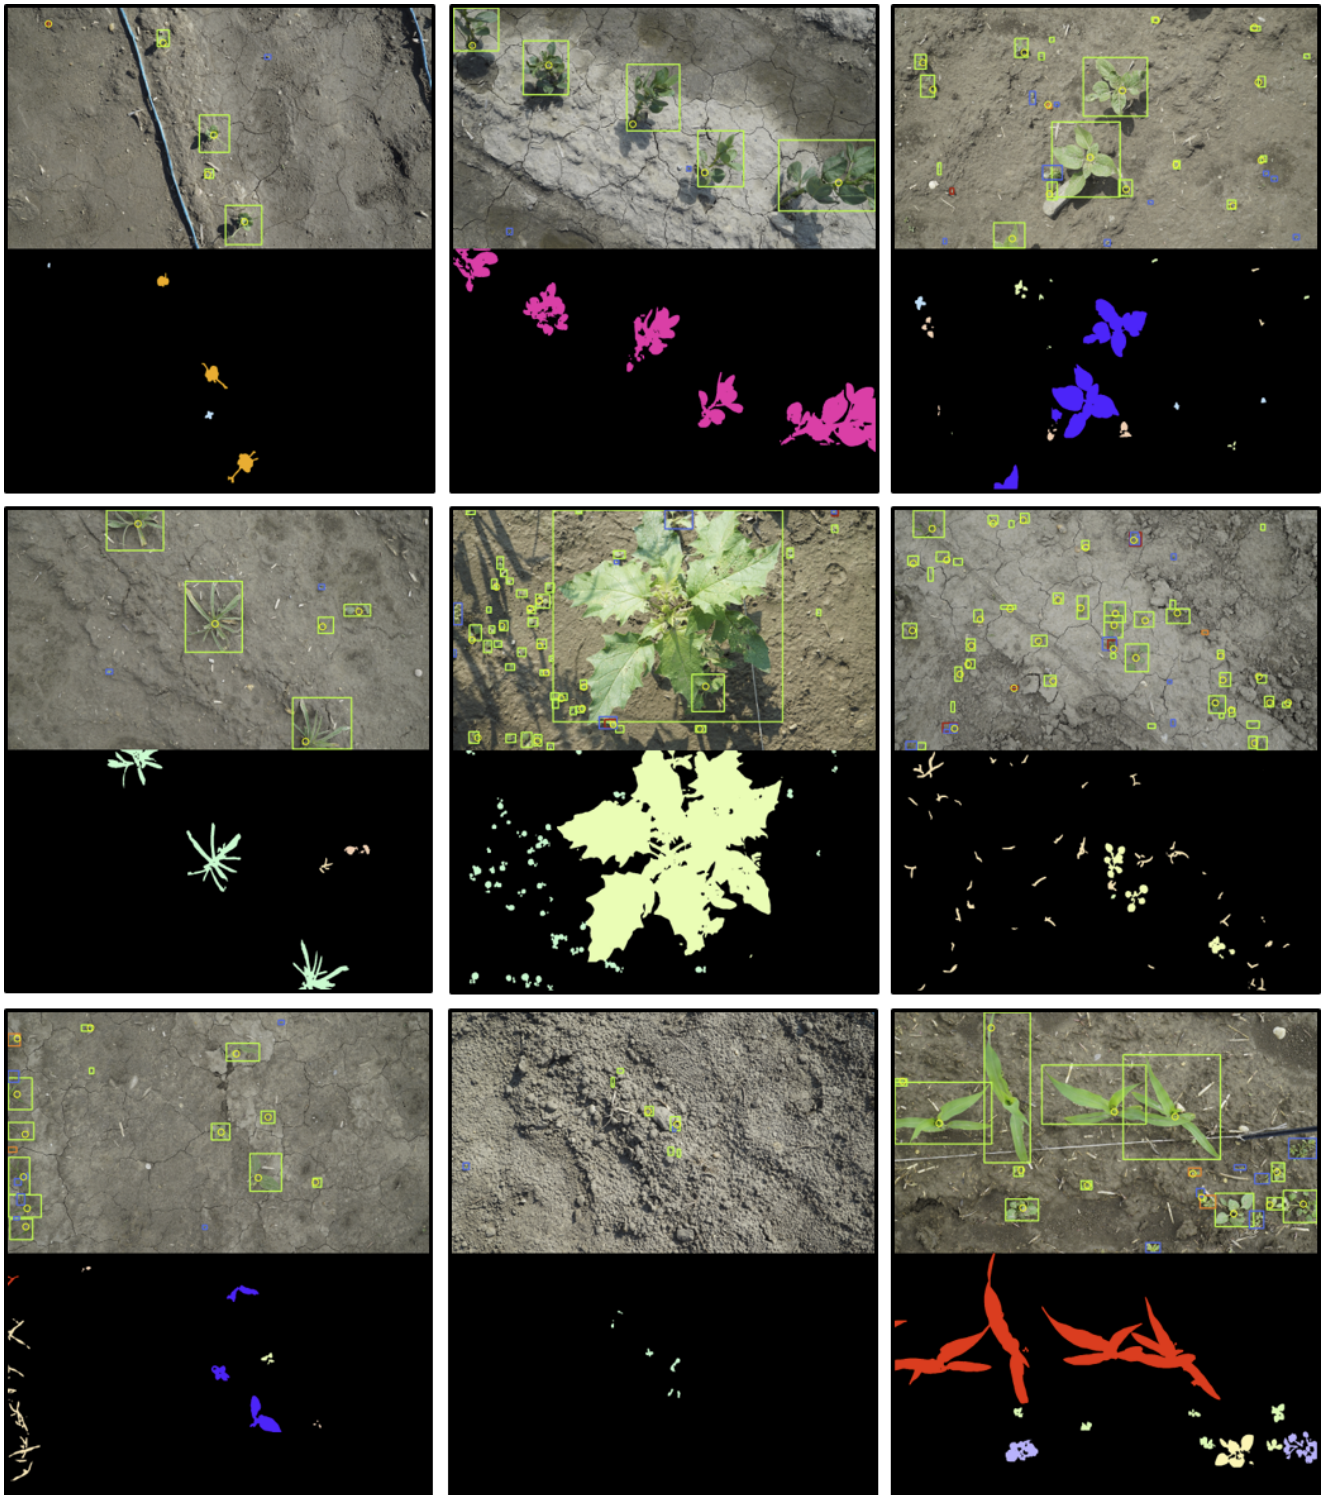

Figure 2. Representative selection of combined qualitative results on the test set for detection, segmentation and stem localization. Top rows show detection results of the *Fine24* model (green: correct detection (*TP*), orange: correct localization, but incorrect class, red: incorrect detection (*FP*), blue: undetected ground-truth object (*FN*)). The detections are then used as inputs for stem localization (yellow) and the *Coarse1* segmentation model. Results of the latter are demonstrated in the bottom rows, with colors corresponding to the detected classes.
